# Supplementary material for: Formation of bicyclic pyrroles from the catalytic coupling reaction of 2,5-disubstituted pyrroles with terminal alkynes, involving the activation of multiple C–H bonds
Source: Royal Society of Chemistry journal article supplement (doi:10.1039/b804263b), 2008-01-01
Supplement: b804263b.pdf [file b804263b.pdf]

## Supplementary Information

### **Formation of bicyclic pyrroles from the catalytic coupling reaction of 2,5-disubstituted pyrroles with terminal alkynes involving multiple C-H bond activation**

**Chae S. Yi\* and Jie Zhang**

*Department of Chemistry, Marquette University, Milwaukee, Wisconsin, USA*  
Fax: 1-414-288-7066; Tel: 1-414-288-3536; E-mail: chae.yi@marquette.edu

|                                                        |     |
|--------------------------------------------------------|-----|
| Experimental procedure                                 | p.2 |
| Characterization data of organic compounds             | p.2 |
| Plot of $\ln([2\mathbf{e}]_t/[2\mathbf{e}]_0)$ vs time | p.5 |
| Selected spectra of organic products                   | p.6 |

## Experimental details

**General information.** All operations were carried out in an inert-atmosphere glove box or by using standard high vacuum and Schlenk techniques. Tetrahydrofuran, benzene, hexanes were distilled from purple solutions of sodium and benzophenone immediately prior to use.  $\text{CH}_2\text{Cl}_2$  was distilled from  $\text{CaH}_2$ . The NMR solvents were dried from activated molecular sieves (4 Å). Pyrrole and alkyne substrates were received from commercial sources and used without further purification. The  $^1\text{H}$ ,  $^2\text{H}$  and  $^{13}\text{C}$  NMR spectra were recorded on a Varian Mercury 300 MHz or 400 MHz FT-NMR spectrometer. Mass spectra were recorded from a Hewlett-Packard HP5970 GC/MS spectrometer. Elemental analyses were performed at the Midwest Microlab, Indianapolis, Indiana, USA.

**Typical procedure of the catalytic reaction.** In a glove box,  $\text{Ru}_3(\text{CO})_{12}$  (0.03 mmol),  $\text{NH}_4\text{PF}_6$  (0.1 mmol), 2,5-dimethylpyrrole (1.0 mmol) and an alkyne (2.0 mmol) were dissolved in 5 mL benzene solution in a medium-walled 25 mL Schlenk tube equipped with teflon stopcock and a magnetic stirring bar. The tube was sealed and was brought out of the box. The reaction tube was heated in an oil bath at 95 °C for 36-48 h. The tube was opened to air at room temperature, and the crude product mixture was analysed by GC/MS. The solvent was removed under a rotary evaporator, and the organic product was isolated by a column chromatography on silica gel (hexane/ $\text{CH}_2\text{Cl}_2$ ) under nitrogen. For the combined catalyst system: 2,5-dimethylpyrrole (1.0 mmol), phenylacetylene (2.0 mmol),  $\text{Ru}_3(\text{CO})_{12}$  (0.03 mmol),  $\text{NH}_4\text{PF}_6$  (0.1 mmol),  $\text{Au}(\text{PPh}_3)\text{Cl}$  (0.05 mmol) and  $\text{AgOTf}$  (0.05 mmol) were used under otherwise same reaction conditions.

For **1a**:  $\delta_{\text{H}}$ (300 MHz;  $\text{C}_6\text{D}_6$ ) 7.60-6.83 (8 H, m, Ar), 6.25 (1 H, br s, NH), 6.13 (1 H, s, C=CH), 3.33 (3 H, s,  $\text{OCH}_3$ ), 3.32 (3 H, s,  $\text{OCH}_3$ ), 2.10 (3 H, s,  $\text{CH}_3$ ), 1.92 (3 H, s,  $\text{CH}_3$ ), 1.87 (3 H, s,  $\text{CH}_3$ );  $\delta_{\text{C}}$ (75 MHz,  $\text{C}_6\text{D}_6$ ) 159.6, 158.5, 141.1, 138.6, 138.1, 135.4, 130.2, 129.2, 127.8, 127.4, 117.2, 114.2, 114.1, 114.0, 54.8 ( $\text{OCH}_3$ ), 54.7 ( $\text{OCH}_3$ ), 50.3 ( $\text{CCH}_3$ ), 24.7 ( $\text{CH}_3$ ), 13.0 ( $\text{CH}_3$ ), 11.8 ( $\text{CH}_3$ );  $m/z$  (GC-MS) 359 ( $\text{M}^+$ ); Found: C, 79.62; H, 7.34; N, 3.25. Calc. for  $\text{C}_{24}\text{H}_{25}\text{NO}_2$ : C, 80.19; H, 7.01; N, 3.90%.

For **1b**:  $\delta_{\text{H}}$ (400 MHz;  $\text{C}_6\text{D}_6$ ) 7.58-7.03 (8 H, m, Ar), 6.20 (1 H, br s, NH), 6.17 (1 H, s, C=CH), 2.15 (6 H, s,  $\text{CH}_3$ ), 2.08 (3 H, s,  $\text{CH}_3$ ), 1.90 (3 H, s,  $\text{CH}_3$ ), 1.86 (3 H, s,  $\text{CH}_3$ );  $\delta_{\text{C}}$ (75 MHz,  $\text{C}_6\text{D}_6$ ) 142.9, 141.4, 138.9, 136.6, 135.1, 135.0, 134.7, 129.1, 127.9, 126.7, 117.0, 114.1, 50.6 ( $\text{CCH}_3$ ), 24.3 ( $\text{CH}_3$ ), 21.1 ( $\text{CH}_3$ ), 20.9 ( $\text{CH}_3$ ), 12.8 ( $\text{CH}_3$ ), 11.6 ( $\text{CH}_3$ );  $m/z$  (GC-MS) 327 ( $\text{M}^+$ ); Found: C, 88.02; H, 7.62; N, 4.31. Calc. for  $\text{C}_{24}\text{H}_{25}\text{N}$ : C, 88.03; H, 7.70; N, 4.28%.

For **1c**:  $\delta_{\text{H}}$ (400 MHz;  $\text{C}_6\text{D}_6$ ) 7.61-6.85 (8 H, m, Ar), 6.12 (1 H, s, C=CH), 3.34 (6 H, s,  $\text{OCH}_3$ ), 2.74 (3 H, s,  $\text{NCH}_3$ ), 2.12 (3 H, s,  $\text{CH}_3$ ), 1.94 (3 H, s,  $\text{CH}_3$ ), 1.90 (3 H, s,  $\text{CH}_3$ );  $\delta_{\text{C}}$ (100 MHz,  $\text{C}_6\text{D}_6$ ) 159.4, 158.3, 140.9, 138.7, 138.0, 134.6, 130.3, 129.2, 127.7, 126.4, 119.2, 116.2, 113.9, 113.8, 54.7 ( $\text{OCH}_3$ ), 54.6 ( $\text{OCH}_3$ ), 50.5 ( $\text{CCH}_3$ ), 29.4 ( $\text{NCH}_3$ ), 24.6 ( $\text{CH}_3$ ), 11.7 ( $\text{CH}_3$ ), 11.0 ( $\text{CH}_3$ );  $m/z$  (GC-MS) 373 ( $\text{M}^+$ ); Found: C, 79.87; H, 7.16; N, 3.68. Calc. for  $\text{C}_{25}\text{H}_{27}\text{NO}_2$ : C, 80.40; H, 7.29; N, 3.75%.

For **1d**:  $\delta_{\text{H}}$ (300 MHz; acetone- $d_6$ ) 7.42-7.04 (8 H, m, Ar), 5.93 (1 H, s, C=CH), 3.39 (3 H, s,  $\text{NCH}_3$ ), 2.34 (3 H, s,  $\text{CH}_3$ ), 2.26 (3 H, s,  $\text{CH}_3$ ), 2.20 (3 H, s,  $\text{CH}_3$ ), 2.08 (3 H, s,  $\text{CH}_3$ ), 1.67 (3 H, s,  $\text{CH}_3$ );  $\delta_{\text{C}}$ (75 MHz; acetone- $d_6$ ) 143.4, 141.0, 139.6, 137.4, 135.5, 135.2, 134.2, 129.7, 129.5, 128.3, 127.1, 126.3, 120.1, 117.0, 51.2 ( $\text{CCH}_3$ ), 30.2 ( $\text{NCH}_3$ ), 24.8 ( $\text{CH}_3$ ), 21.2 ( $\text{CH}_3$ ), 20.9 ( $\text{CH}_3$ ), 11.8 ( $\text{CH}_3$ ), 11.2 ( $\text{CH}_3$ );  $m/z$  (GC-MS) 341 ( $\text{M}^+$ ); Found: C, 88.08; H, 8.03; N, 4.02. Calc. for  $\text{C}_{25}\text{H}_{27}\text{N}$ : C, 87.93; H, 7.97; N, 4.10%.

For **1e**:  $\delta_{\text{H}}$ (400 MHz;  $\text{C}_6\text{D}_6$ ) 7.68-7.01 (10 H, m, Ar), 6.24 (1 H, br s, NH), 6.19 (1 H, s, C=CH), 2.10 (3 H, s,  $\text{CH}_3$ ), 1.92 (3 H, s,  $\text{CH}_3$ ), 1.89 (3 H, s,  $\text{CH}_3$ );  $\delta_{\text{C}}$ (100 MHz;  $\text{C}_6\text{D}_6$ ) 145.8, 139.3, 137.5, 134.9, 128.5, 128.4, 127.4, 127.0, 126.1, 121.2, 117.3, 114.3, 51.0 ( $\text{CCH}_3$ ), 24.3 ( $\text{CH}_3$ ), 12.9 ( $\text{CH}_3$ ), 11.7 ( $\text{CH}_3$ );  $m/z$  (GC-MS) 299 ( $\text{M}^+$ ).

For **2e**:  $\delta_{\text{H}}$ (400 MHz;  $\text{C}_6\text{D}_6$ ) 7.68-7.01 (10 H, m, Ar), 6.44 (1 H, br s, NH), 5.53 (2 H, d,  $J = 1.6$  Hz, C=CHH), 5.27 (2 H, d,  $J = 1.6$  Hz, C=CHH), 1.92 (6 H, s,  $\text{CH}_3$ );  $\delta_{\text{C}}$ (100 MHz,  $\text{C}_6\text{D}_6$ ) 144.4, 142.9, 141.8, 128.0, 127.6, 127.2, 126.8, 123.6, 114.4, 12.0 ( $\text{CH}_3$ );  $m/z$  (GC-MS) 299 ( $\text{M}^+$ ).

For **2f**:  $\delta_{\text{H}}$ (300 MHz;  $\text{C}_6\text{D}_6$ ) 7.17-6.95 (8 H, m, Ar), 6.25 (1 H, br s, NH), 5.40 (2 H, d,  $J = 2.4$  Hz, C=CHH), 5.16 (2 H, d,  $J = 2.4$  Hz, C=CHH), 2.07 (6 H, s,  $\text{CH}_3$ ), 1.69 (6 H, s,  $\text{CH}_3$ );  $\delta_{\text{H}}$ (400 MHz; acetone- $d_6$ ) 9.58 (1 H, br s, NH), 7.05-6.94 (8 H, m, Ar), 5.21 (2 H, d,  $J = 2.7$  Hz, C=CHH), 5.98 (2 H, d,  $J = 2.7$  Hz, C=CHH), 1.99 (6 H, s,  $\text{CH}_3$ ), 1.92 (6 H, s,  $\text{CH}_3$ );  $\delta_{\text{C}}$ (75 MHz,  $\text{C}_6\text{D}_6$ ) 144.5, 143.2, 135.8, 130.6, 130.4, 126.9, 125.4, 123.4,

121.3, 117.0 (C=CH<sub>2</sub>), 20.6 (CH<sub>3</sub>), 11.9 (CH<sub>3</sub>);  $\delta_{\text{C}}$ (100 MHz; acetone-*d*<sub>6</sub>) 145.6, 143.9, 136.4, 130.0, 130.9, 127.4, 125.9, 124.6, 121.3, 116.6 (C=CH<sub>2</sub>), 20.7 (CH<sub>3</sub>), 12.0 (CH<sub>3</sub>); *m/z* (GC-MS) 327 (M<sup>+</sup>); Found C, 87.26; H, 7.70; N, 4.32. Calc. for C<sub>24</sub>H<sub>25</sub>N: C, 88.03; H, 7.70; N, 4.28%.

For **3f**:  $\delta_{\text{H}}$ (300 MHz; C<sub>6</sub>D<sub>6</sub>) 7.41-7.11 (4 H, m, Ar), 6.25 (1 H, br s, NH), 5.91 (1 H, s, C=CH), 5.51 (1 H, d, *J* = 1.8 Hz, C=CHH), 5.05 (1 H, d, *J* = 1.8 Hz, C=CHH), 2.27 (3 H, s, CH<sub>3</sub>), 1.81 (3 H, s, CH<sub>3</sub>), 1.64 (3 H, s, CH<sub>3</sub>);  $\delta_{\text{C}}$ (75 MHz, C<sub>6</sub>D<sub>6</sub>) 145.9, 144.3, 136.1, 130.1, 129.8, 125.9, 124.6, 123.3, 121.0, 20.1 (CH<sub>3</sub>), 12.7 (CH<sub>3</sub>), 12.6 (CH<sub>3</sub>); *m/z* (GC-MS) 211 (M<sup>+</sup>).

**Figure S1.** Pseudo first order plot of  $\ln([2e]_t/[2e]_0)$  vs time

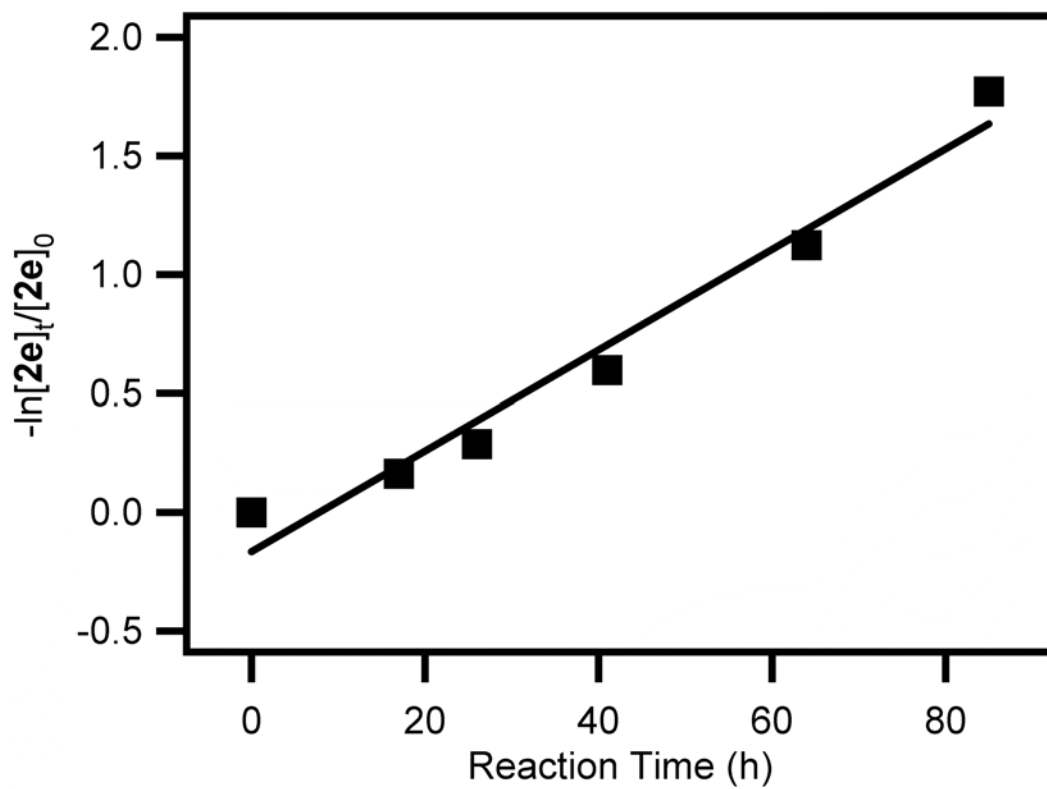

$^1\text{H}$  and  $^{13}\text{C}\{^1\text{H}\}$  NMR of **1a** in  $\text{C}_6\text{D}_6$

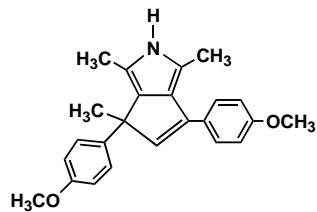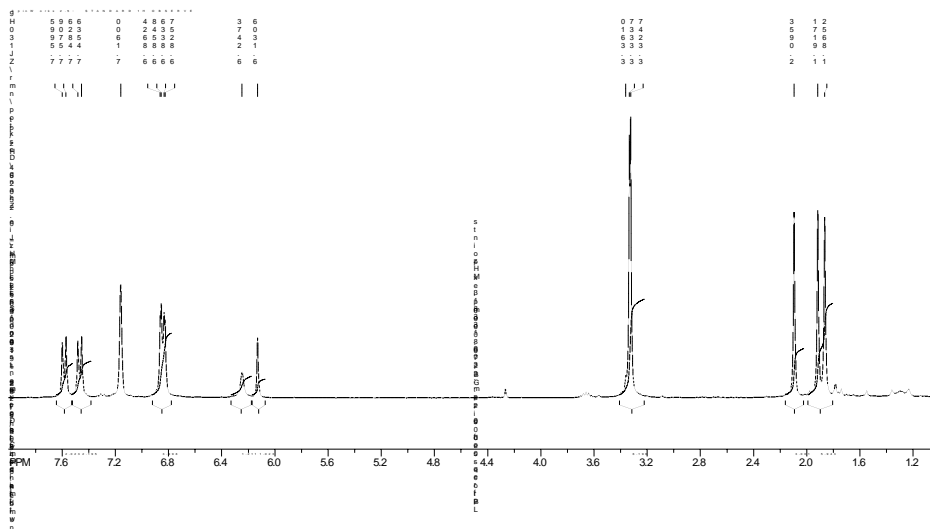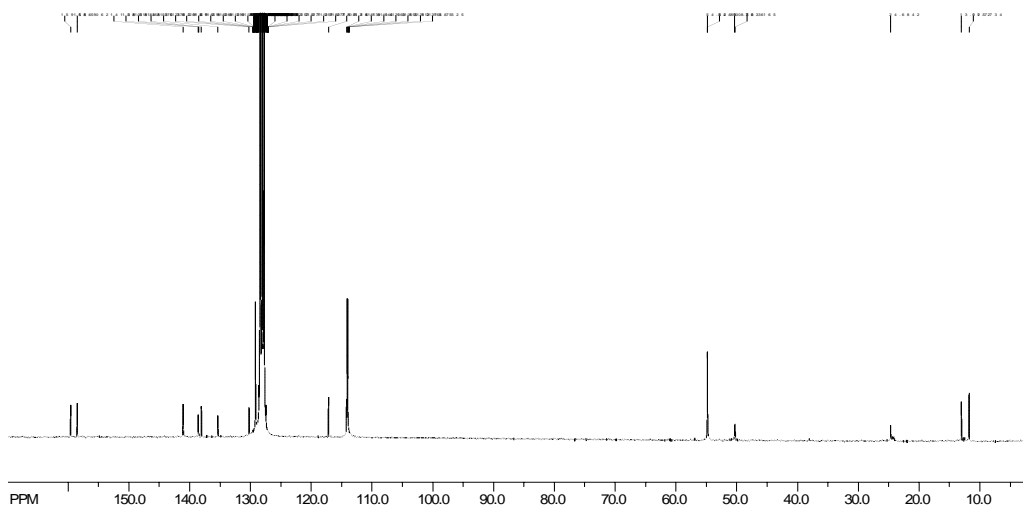

file: C:\Documents and Settings\Sung Jin Choi\Desktop\mm\Z\217C\fd\fd\ block1 1 exp: "s2pu"

freq. of 0 ppm: 75.46880 MHz  
processed size: 131072 complex points  
LB: 0.500 GB: 0.0000



$^1\text{H}$  and  $^{13}\text{C}\{^1\text{H}\}$  NMR of **1c** in  $\text{C}_6\text{D}_6$

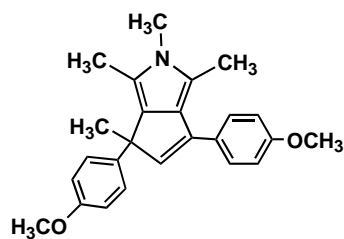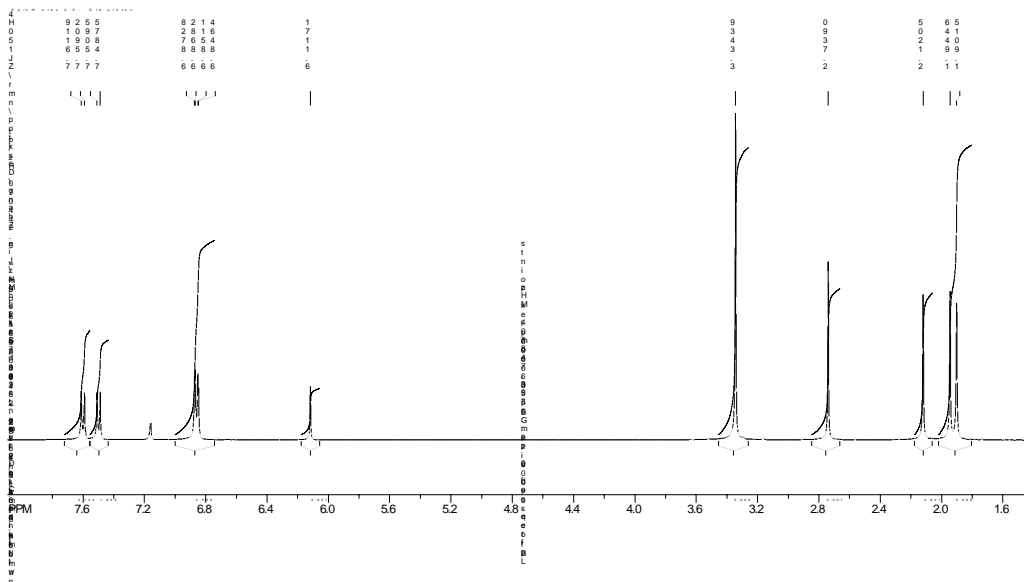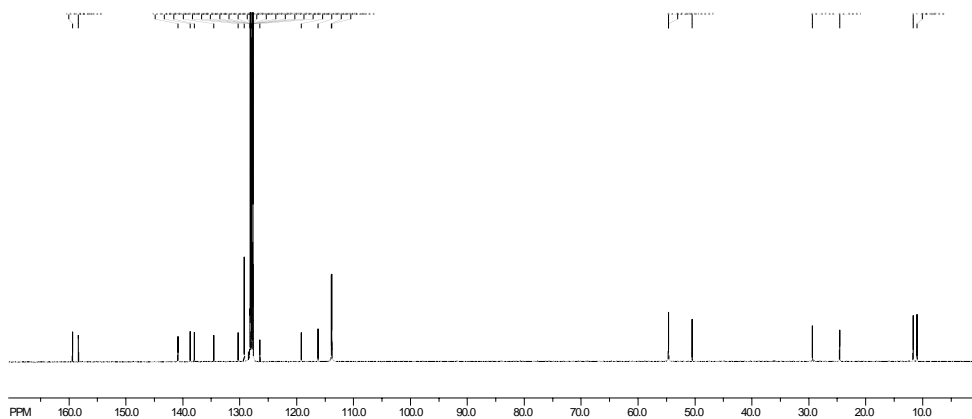

File: C:\Documents and Settings\li.zhang\Desktop\1c\21000400\1c\1c1e1d\block1 1 exp\_1dpu1  
 transmitter freq: 101.627427 MHz  
 time domain size: 65536 points  
 width: 24603.80 Hz = 243.82200 ppm = 0.384681 epp  
 number of scans: 22000

freq of 0 ppm: 100.628823 MHz  
 processed size: 65536 complex points  
 LB: 0.000 GB: 0.0000



$^{13}\text{C}\{^1\text{H}\}$  NMR of **2f** in  $\text{C}_6\text{D}_6$

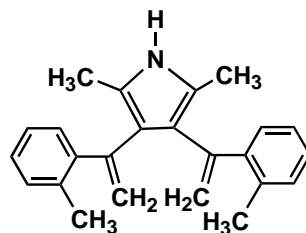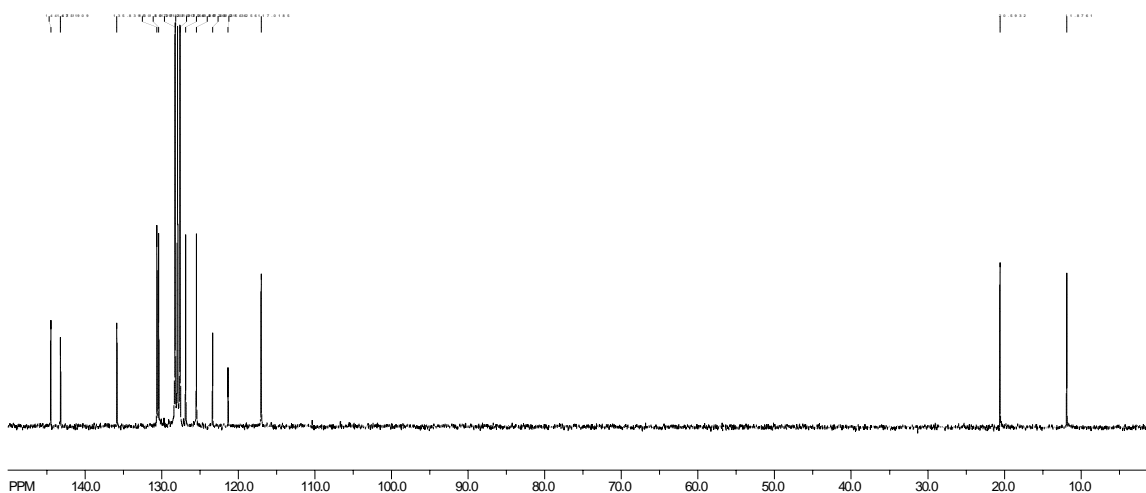

file: C:\Documents and Settings\Life Zheng\Desktop\rm\2f1230223.fid\td block# 1 exp: 12pu  
transmitter freq.: 75.478394 MHz  
time domain size: 65492 points  
width: 18887.92 Hz = 249.952459 ppm = 0.275476 Hz/pt  
number of scans: 320

freq. of 0 ppm: 75.488891 MHz  
processed size: 131072 complex points  
LB: 0.000 GB: 0.0000

$^1\text{H}$  and  $^{13}\text{C}\{^1\text{H}\}$  NMR of **3f** in  $\text{C}_6\text{D}_6$

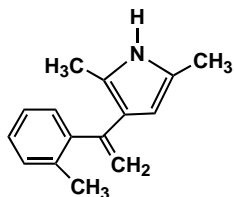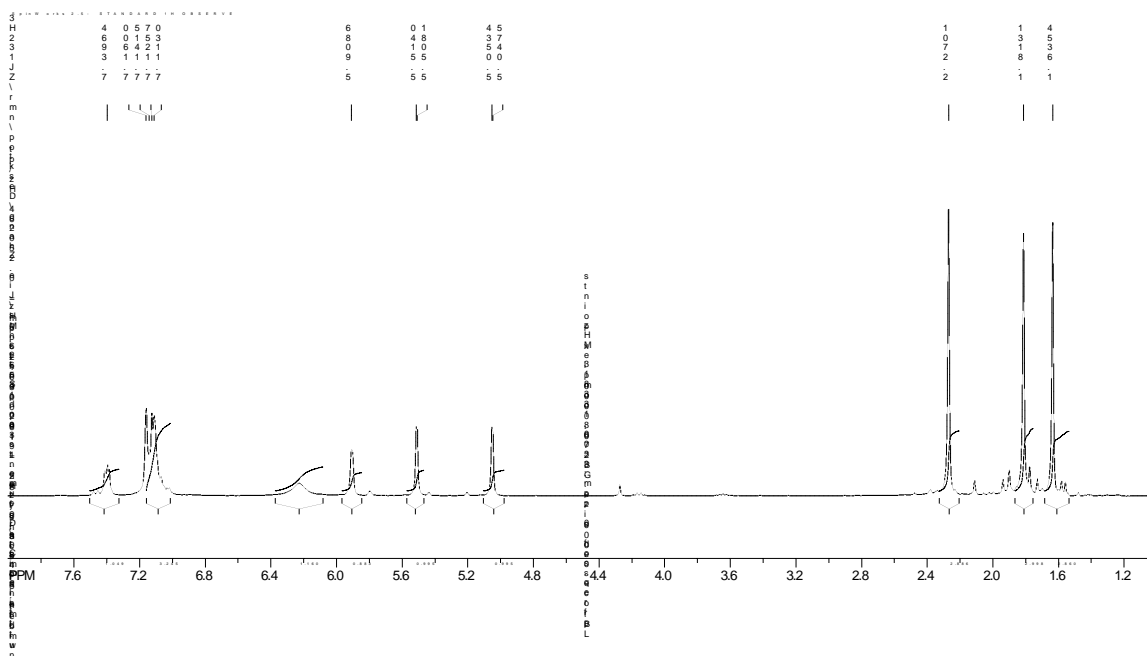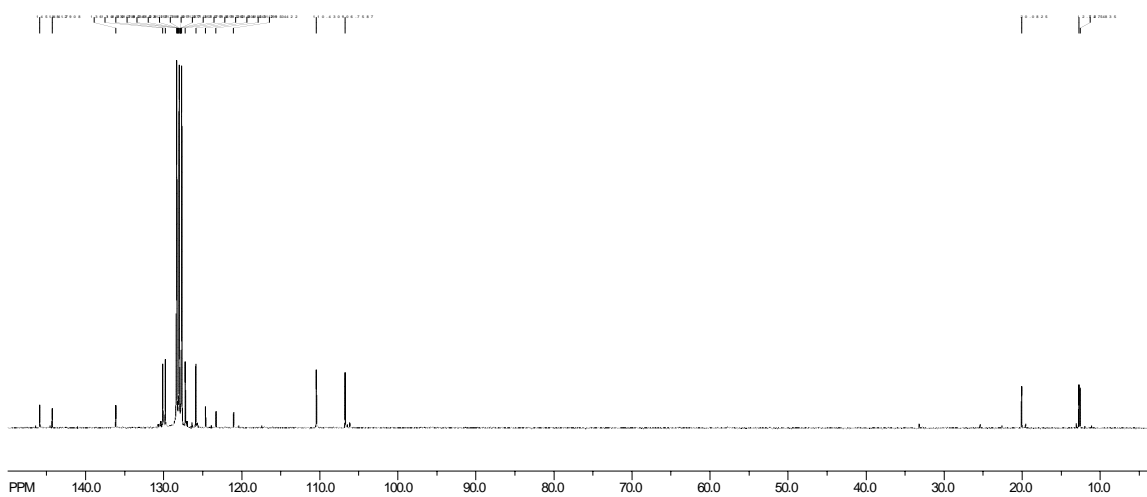

file: C:\Documents and Settings\Jie Zheng\Desktop\13C\13C300-920\data\book1 exp1.12pu  
 transmitter freq.: 75.476994 MHz  
 time domain size: 65492 points  
 width: 19927.52 Hz → 261.820459 ppm → 0.275476 Hz/pt  
 number of scans: 2112

freq. of 0 ppm: 75.468894 MHz  
 processed size: 131072 complex points  
 LB: 0.000 Gb: 0.0000
